# Supplementary material for: Integrated analysis of transcriptome and metabolome of Arabidopsisalbino or pale green mutants with disrupted nuclear-encoded chloroplast proteins
Source: PubMed Central journal article supplement (PMC4052017; doi:10.1007/s11103-014-0194-9), 2014-05-03
Supplement: 11103_2014_194_MOESM7_ESM.pdf [file 11103_2014_194_MOESM7_ESM.pdf]

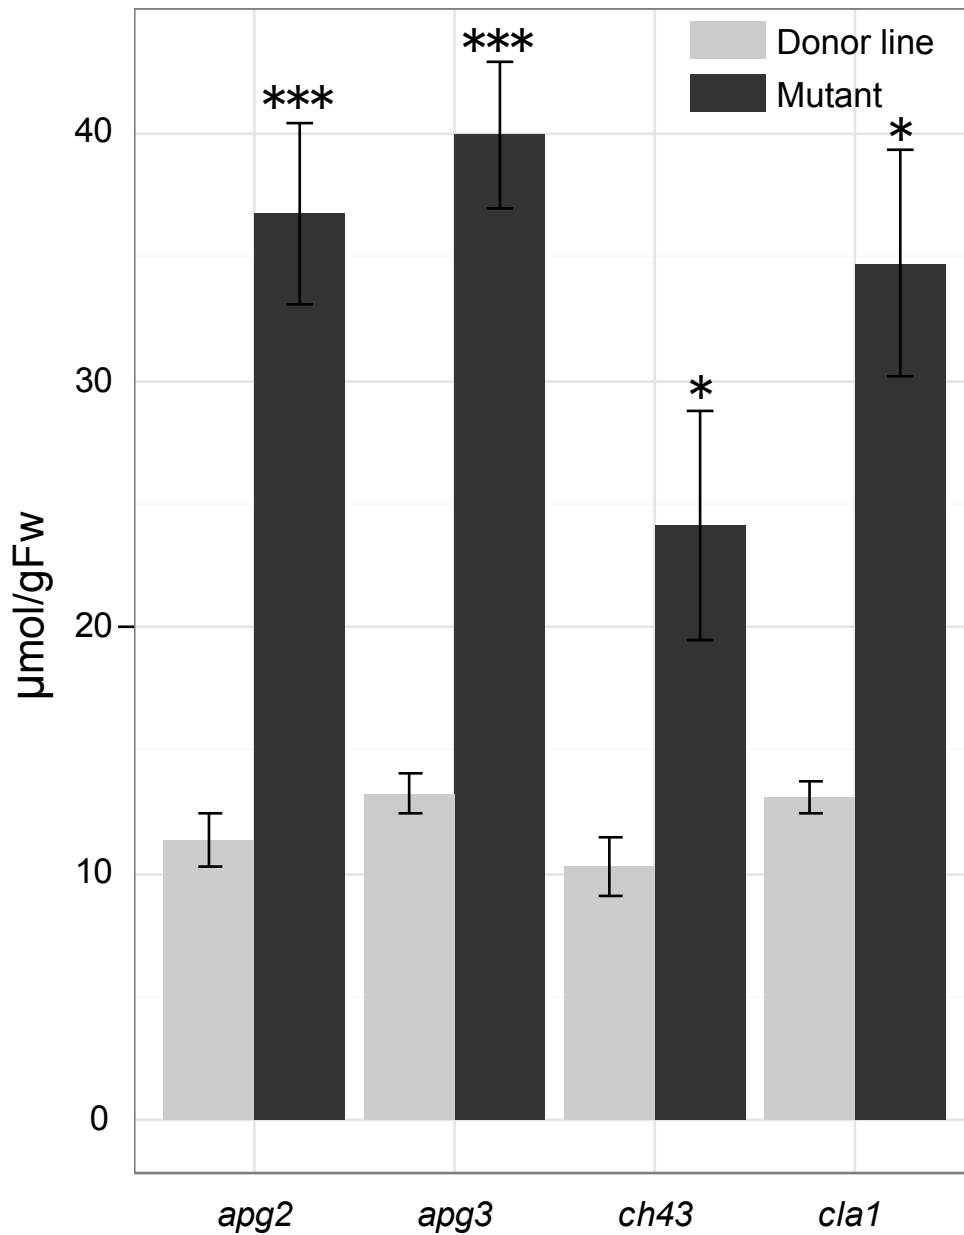

**Supplemental Figure 2.** Endogenous ammonium levels in albino and pale green mutants and their *Ds* donor lines (control). Bar graph values are  $\mu\text{mol}$  normalization to per gram fresh weight of the sample. The error bars represent the standard deviation (n=3 biological replicate experiment). Asterisks denote statistical significance compared to *Ds* donor lines (\*Welch't-test:  $P < 0.05$ , \*\*\* $P < 0.01$ ).
